# Supplementary material for: Repression of Transcription at DNA Breaks Requires Cohesin throughout Interphase and Prevents Genome Instability
Source: PubMed Central journal article supplement (PMC6344341; doi:10.1016/j.molcel.2018.11.001), 2019-01-17

**Molecular Cell, Volume 73**

**Supplemental Information**

**Repression of Transcription at DNA Breaks**

**Requires Cohesin throughout Interphase**

**and Prevents Genome Instability**

**Cornelia Meisenberg, Sarah I. Pinder, Suzanna R. Hopkins, Sarah K. Wooller, Graeme Benstead-Hume, Frances M.G. Pearl, Penny A. Jeggo, and Jessica A. Downs**

**SUPPLEMENTARY INFORMATION**

**TABLE S1. Mutational signatures associated with bladder cancers with and without mutations in SA2. Related to Figure 7.** Bladder cancer samples were stratified based on SA2 mutational status (bld = wt SA2, stg = mutant STAG2) and analysed using NMMF (Figure 7A, B, see text and methods for details). These were compared to the signatures identified by (Alexandrov et al., 2015), and the assignments are listed below.

|           | Cluster 1 | Cluster 2 | Cluster 3     | Cluster 4 | Cluster 5 | Cluster 6 |
|-----------|-----------|-----------|---------------|-----------|-----------|-----------|
| STAG2 wt  | bld_sig1  | bld_sig2  | bld_sig3      | bld_sig4  | bld_sig5  |           |
| STAG2 mut |           | stg_sig1  | stg_sig3,5    |           | stg_sig2  | stg_sig4  |
| COSMIC    | ature 15  | ature 1   | gnature 13, 2 | ature 16  | ature 10  | ature 3   |

**TABLE S2: Antibodies, Related to STAR Methods**

| Antibody                                | Source                  | Identifier | Dilution     | Host   |
|-----------------------------------------|-------------------------|------------|--------------|--------|
| <b>ARID2 (E-3)</b>                      | Santa Cruz              | sc-166117  | WB: 1:500    | mouse  |
| <b>ATM (D2E2)</b>                       | Cell Signlling          | 2873       | WB: 1:1000   | rabbit |
| <b>Baf180</b>                           | Millipore               | ABE70      | WB: 1:1000   | rabbit |
| <b>BMI1</b>                             | Bethyl                  | A301-694A  | WB: 1:1000   | rabbit |
| <b>BRG1 (G7)</b>                        | Santa Cruz              | sc-17796   | WB: 1:500    | mouse  |
| <b>CENPF</b>                            | Bethyl                  | A301-611A  | IS:1:250     | rabbit |
| <b>CTCF</b>                             | Millipore               | 07-729     | WB: 1:1000   | rabbit |
| <b>Cyclin D1</b>                        | Neomarkers              | RB-010-PO  | IS:1:250     | rabbit |
| <b>Esco2</b>                            | Abcam                   | ab86003    | WB: 1:500    | rabbit |
| <b>EZH2</b>                             | Cell Signaling          | 5246       | WB: 1:1000   | rabbit |
| <b>GFP (B2)</b>                         | Santa Cruz              | sc-9996    | WB: 1:1000   | mouse  |
| <b>H2A-K119ub (E5C5)</b>                | Millipore               | 05-678     | IS:1:250     | mouse  |
| <b>NIPBL</b>                            | Abcam                   | ab106768   | WB: 1:1000   | rat    |
| <b>PDS5A</b>                            | Abcam                   | ab122352   | WB: 1:1000   | rabbit |
| <b>PDS5B</b>                            | Abcam                   | ab70298    | WB: 1:1000   | rabbit |
| <b>Rad21</b>                            | Abcam                   | ab992      | WB: 1:1000   | rabbit |
| <b>SMC3</b>                             | Abcam                   | ab155587   | WB: 1:1000   | rabbit |
| <b>SA1</b>                              | Abcam                   | ab4457     | WB: 1:2000   | goat   |
| <b>SA2</b>                              | Abcam                   | ab4463     | WB: 1:2000   | goat   |
| <b>WAPL</b>                             | Abcam                   | ab70741    | WB: 1:1000   | rabbit |
| <b><math>\alpha</math>-tubulin</b>      | Abcam                   | ab7291     | WB: 1:10,000 | mouse  |
| <b><math>\gamma</math>H2AX (JBW301)</b> | Millipore               | 05-636     | IS:1:400     | mouse  |
| <b>Goat Anti-Rabbit HRP</b>             | Agilent (Dako)          | P044801-2  | WB: 1:3000   |        |
| <b>Rabbit Anti-Mouse HRP</b>            | Agilent (Dako)          | P026002-2  | WB: 1:3000   |        |
| <b>Rabbit Anti-Goat HRP</b>             | Agilent (Dako)          | P044901-2  | WB: 1:3000   |        |
| <b>Goat Anti-Rat HRP</b>                | Millipore               | AP136P     | WB: 1:3000   |        |
| <b>Goat Anti-Mouse FITC</b>             | Sigma Aldrich           | F0257-1ML  | IS:1:300     |        |
| <b>Sheep Anti-rabbit Cy3</b>            | Sigma Aldrich           | C2306-1ML  | IS:1:300     |        |
| <b>Goat Anti-Mouse Fluor 555</b>        | ThermoFisher Scientific | A-21422    | IS:1:300     |        |

**TABLE S3: siRNA sequences, Related to STAR Methods**

| siRNA                                  | Source            | Catalogue No / Sequence (5'-3') |
|----------------------------------------|-------------------|---------------------------------|
| ARID2 SMARTpool: ON-TARGETplus         | Dharmacon         | L-026945-01-0005                |
| Baf180 SMARTpool: ON-TARGETplus        | Dharmacon         | L-008692-01-0005                |
| BRG1 SMARTpool: ON-TARGETplus          | Dharmacon         | L-010431-00-0005                |
| BRM SMARTpool: ON-TARGETplus           | Dharmacon         | L-017253-00-0005                |
| CTCF SMARTpool: ON-TARGETplus          | Dharmacon         | L-020165-00-0005                |
| Esco2 SMARTpool: ON-TARGETplus         | Dharmacon         | L-025788-01-0005                |
| NIPBL SMARTpool: ON-TARGETplus         | Dharmacon         | L-012980-00-0005                |
| NTC: Non-targeting pool: ON-TARGETplus | Dharmacon         | D-001810-10-20                  |
| Rad21 SMARTpool: ON-TARGETplus         | Dharmacon         | L-006832-00-0005                |
| SMC3 SMARTpool: ON-TARGETplus          | Dharmacon         | L-006834-00-0005                |
| SA2 SMARTpool: ON-TARGETplus           | Dharmacon         | L-021351-00-0005                |
| WAPL SMARTpool: ON-TARGETplus          | Dharmacon         | L-026287-01-0005                |
| ATM                                    | Eurofins Genomics | CCAUGAAUCUAUUUAACGA             |
| NTC                                    | Eurogentec        | UUCUUCGAACGUGUCACGU             |
| PDS5A (seq1)                           | Eurogentec        | GUGAUGCCUCCUAAAUGA              |
| PDS5A (seq2)                           | Eurogentec        | GCUCCAUUAACUCCCAUG              |
| PDS5B (seq1)                           | Eurogentec        | GCUCCUUACACAUCCUG               |
| PDS5B (seq2)                           | Eurogentec        | GAGACGACUCUGAUCCUUGU            |
| Sororin                                | Eurogentec        | GCCUAGGUGUCCUUGAGCU             |
| SA1                                    | Eurofins Genomics | GUGAUGCCUCCUAAAUGA              |
| SA2 (seq05)                            | Eurogentec        | GAAAUUUACUUGCAGCAUU             |
| SA2 (seq06)                            | Eurogentec        | GUAGAUGAUUGGAUAGAAU             |
| SA2 (seq07)                            | Eurogentec        | GGGAUUUAUUUGCUUGUAA             |
| SA2 (seq08)                            | Eurogentec        | CCACUGAUGUCUUAACCGAA            |

**TABLE S4: Primer sequences, Related to STAR Methods**

| Primer                  | Source                | Sequence (5' – 3')                 |
|-------------------------|-----------------------|------------------------------------|
| Reporter transcript FWD | Shanbhag et al., 2010 | TCATTAGATCCTGAGAACTTCA             |
| Reporter transcript REV | Shanbhag et al., 2010 | TTTTGGCAGAGGGAAAAAGA               |
| TMPRSS2-CR-3F           | Li et al., 2018       | CACCGTTCATTACGATCCCTAACA           |
| TMPRSS2-CR-3R           | Li et al., 2018       | AAACTGTTAGGGATCGTGAATGAAC          |
| ERG-CR-2F               | Li et al., 2018       | CACCGGATGGTAAACGGAGAGTGC           |
| ERG-CR-2R               | Li et al., 2018       | AAACGCACTCTCCGTTTACCATCCC          |
| TMPRSS2_rtPCR FWD       | This paper            | CTGGTGGCTGATAGGGGAT                |
| TMPRSS2_rtPCR REV       | This paper            | GTCTGCCCTCATTTGTGCGAT              |
| TMPRSS2:ERG FWD         | This paper            | AGCGCGGCAGGAAGCCTTAT               |
| TMPRSS2:ERG REV         | Mani et al., 2016     | CCGTAGGCACACTCAAACAACGA            |
| Actin_rtPCR FWD         | Lin et al., 2009      | GCTCGTCTGTCGACAACGGGCTC            |
| Actin_rtPCR REV         | Lin et al., 2009      | CAAACATGATCTGGGTCATCTTCTC          |
| cyclophilin A_rtPCR FWD | This paper            | CTGGACCCAACACAAATGGT               |
| cyclophilin A_rtPCR REV | This paper            | GCCTTCTTTCACTTTGCCAAAC             |
| Sororin_rtPCR FWD       | This paper            | AGTCTCGCCAGTGGTGTGCT               |
| Sororin_rtPCR REV       | This paper            | TTCAACCAGGAGATCAAACCTGC            |
| GAPDH_rtPCR FWD         | This paper            | ACATCGCTCAGACACCATG                |
| GAPDH_rtPCR REV         | This paper            | TGTAGTTGAGGTCAATGAAGGG             |
| SA2 08_siRes_SDM_P1 FWD | This paper            | GGATGTGTGGCTTCCATTAATGTCTTACCGA    |
| SA2 08_siRes_SDM_P1 REV | This paper            | TCGGTAAGACATTAATGGAAGCCACACATCC    |
| SA2 08_siRes_SDM_P2 FWD | This paper            | GGCTTCCATTAATGAGTTACCGAAATCTTTG    |
| SA2 08_siRes_SDM_P2 REV | This paper            | CAAAGAATTTCCGGTAACTCATTAAATGGAAGCC |
| SA2_V181M_SDM FWD       | This paper            | GTGAATTCATTGGCATGTTAGTACGGCAATGTC  |
| SA2_V181M_SDM REV       | This paper            | GACATTCGCCGTAACATGCTCAATGAATTCAC   |
| SA2_S202L_SDM FWD       | This paper            | GATGGATACAGTCATTTACTTCTTACAGGATTG  |
| SA2_S202L_SDM REV       | This paper            | CAATCCTGTAAGAAGTAAAATGACTGTATCCATC |
| Rad21 HindIII_PCR FWD   | This paper            | GCCAAGCTTGGTTCTACGCACATTTTGTCTCAG  |

|                     |            |                                     |
|---------------------|------------|-------------------------------------|
| Rad21 Sal1_PCR REV  | This paper | GCCGTCGACTTATATAATATGGAACCTTGGTCCAG |
| SA2 HindIII_PCR FWD | This paper | GGCAAGCTTCGATAGCAGCTCCAGAAATACCA    |
| SA2 Kpn1_PCR REV    | This paper | GCGGGTACCTTAAAACATTGACACTCCAAGAAC   |

#### SUPPLEMENTARY INFORMATION FIGURE LEGENDS

#### Figure S1. The centromere-specific cohesin complex is required for transcriptional repression at DNA double strand breaks. Related to Figure 1.

**(A)** Quantitative PCR analysis of U2OS 263 IFII reporter transcript following indicated siRNA treatment, doxycycline-induced transcription (Tx) and mCherry-FokI DSB induction (DSB). Data represent SEM for n=5 biological replicates. \*\*p<0.01, paired Student's *t* test. **(B)** Quantification of total EU intensity in U2OS cells treated with the indicated siRNA, data are represented as the mean +/- SD, n=4 biological replicates. **(C)** Western blot analysis of whole cell extracts prepared from BAF180 deletion (knockout; KO) and parental cells (U2OS) showing BAF180 deletion does not affect SA2 protein levels. **(D)** Quantification of EU intensity following laser microirradiation in BAF180 KO and parental U2OS cells. **(E)** Quantification of H2A K119ub foci in U2OS cells treated with the indicated siRNA, or irradiated BAF180 KO or parental U2OS cells 20 min following 1.5 Gy irradiation or no irradiation. 150 cells were counted per condition for each of n=3 biological replicates, and data are presented as the mean +/- SEM. \*p<0.05, paired Student's *t* test. **(F)** Quantification of  $\gamma$ H2AX foci in U2OS cells treated with the indicated siRNA following irradiation with 1.5 Gy. 36 cells counted per condition for each of n=3 biological replicates, and data are presented as the mean +/- SD. \*p<0.05, paired Student's *t* test. **(G)** Western blot analysis of whole cell extracts prepared from samples treated as in (E).  $\alpha$ -tubulin is used as a loading control.

**Figure S2. Cohesin- and PBAF-dependent transcriptional repression at DNA double strand breaks occurs both in G1 and G2 phases. Related to Figure 2.**

**(A)** RFP-tagged Cdt1 expression is restricted to G1 and very early S phase and Geminin-GFP expression is restricted to late S and G2 (left panel, adapted from Thermofisher FUCCI Cell Cycle Sensor product information) and each was individually used to discriminate between cells in and outside of G1 or S/G2 phase (Cdt1 example shown in right panels). **(B)** Recruitment of RFP-tagged SA2 to laser microirradiation induced DNA damage in cells expressing GFP-tagged Geminin. SA2 recruitment in cells in GFP-positive (in late S/G2) and GFP-negative (outside of late S/G2) cells was similar. Data represents the relative mean signal intensity +/- SEM, n=3 biological replicates. **(C)** Western blot analysis of whole cell extracts prepared from cells transfected with no construct or eGFP-tagged BAF180 (used in Figure 2).  $\alpha$ -tubulin is used as a loading control. **(D)** Western blot analysis of whole cell extracts prepared from cells transfected with no construct or eGFP-tagged SA2 (used in Figure 2).  $\alpha$ -tubulin is used as a loading control. **(E)** Recruitment of eGFP-tagged STAG2 to *FokI*-induced DSBs in the U2OS 265 reporter cell line. **(F)** Recruitment of eGFP-tagged Rad21 to laser microirradiation induced DNA damage. Data represents the relative mean signal intensity +/- SEM, n=1. **(G)** Representative images of Rad21 recruitment to laser microirradiation induced DNA damage (arrow). **(H)** Western blot analysis of whole cell extracts prepared from cells transfected with no construct or eGFP-tagged Rad21 (used in panels F and G).  $\alpha$ -tubulin is used as a loading control. **(I)** Western blot analysis of whole cell extracts prepared from stable cell lines expressing shNTC or shBAF180 (Hopkins et al., 2016).  $\alpha$ -tubulin is used as a

loading control. **(J)** Recruitment of eGFP-tagged STAG2 to laser microirradiation induced DNA damage in stable cell lines expressing shNTC or shBAF180. Data represents the relative mean signal intensity  $\pm$  SEM, n=2. **(K)** Recruitment of eGFP-tagged BAF180 to laser microirradiation induced DNA damage in siNTC- or siSA2- treated cell lines. Data represents the relative mean signal intensity  $\pm$  SEM, n=3 biological replicates.

**Figure S3. CTCF is not required to promote transcriptional repression at DNA DSBs. Related to Figure 3. (A)** Quantification of transcription in U2OS reporter cells with or without induction of the *FokI* endonuclease treated with the indicated siRNA. Data are represented as the mean  $\pm$  SD. n=3. **(B)** Western blot analysis of whole cell extracts prepared from cells treated with siRNAs as in panel A.  $\alpha$ -tubulin is used as a loading control. **(C)** Quantification of EU intensity following laser microirradiation following siRNA depletion of the indicated proteins. Data are represented as the mean  $\pm$  SEM for n=3 biological repeats.

**Figure S4. Characterisation of individual siRNAs directed against SA2 for use in creating siRNA-resistant SA2 expression constructs. Related to Figure 4. (A)** Western blot of whole cell extracts prepared from cells treated with the indicated siRNA. Individual siRNAs (05 through 08) were tested in parallel with the pooled siRNA (Mix) against SA2 to determine their silencing efficiency.  $\alpha$ -tubulin is used as a loading control. **(B)** Quantification of transcription in U2OS reporter cells with or without induction of the *FokI* endonuclease treated with the indicated siRNA. Individual siRNAs (05 through 08) were tested in parallel with the pooled siRNA (Mix) against SA2 to determine their impact on DNA DSB-induced

transcriptional silencing. Data are represented as the mean  $\pm$  SD.  $n=3$  biological replicates. \* $p<0.05$ , \*\* $p<0.01$ , paired Student's  $t$  test. Expression constructs resistant to siRNA 08 were generated for use in the rescue experiments shown in Figure 4.

**Figure S5. Androgen induced TMPRSS2 transcription is not substantially impaired in the absence of BAF180 or STAG2, and is repressed after irradiation. Related to Figure 5. (A, B)** TMPRSS2 expression monitored by RT-qPCR in DHT-induced LNCaP cells treated with the indicated siRNA. Expression is normalised to Cyclophilin A (A) or actin (B). Data are represented by the mean  $\pm$  SD,  $n=4$  (A) and  $n=2$  (B) biological replicates. **(C)** TMPRSS2 expression monitored by RT-qPCR in LNCaP cells that were treated with DHT for 16 hours prior to irradiation with 10 Gy. Expression is normalised to Cyclophilin A. Data are represented by the mean  $\pm$  SD,  $n=7$  biological replicates. \*\*\* $p<0.001$ , paired Student's  $t$  test. **(D)** Translocations between TMPRSS2 and ERG (TMPRSS2:ERG) monitored by RT-qPCR in DHT-induced LNCaP cells treated with the indicated siRNA following irradiation with 0 or 10 Gy. Data are represented for  $n=3$  biological replicates  $\pm$  SEM. \* $p<0.05$ , \*\* $p<0.01$ , \*\*\* $p<0.001$ , paired Student's  $t$  test. **(E, F)** Western blot analysis of whole cell extracts prepared from cells treated with the indicated siRNA.  $\alpha$ -tubulin is used as a loading control.

**Figure S6. Depletion of cohesin or PBAF in U2OS cells leads to increased genome instability in actively transcribed genes. Related to Figure 6. (A)** Experimental strategy for sample preparation. Following sample collection, genomic DNA was prepared and subjected to differential exome sequencing relative to untreated asynchronously growing U2OS cells. See text and methods for details. **(B)** Representative images of cells treated with siSA2 with (right panels) and without (left panels) irradiation and with (bottom panels) and without (top panels) DRB treatment. EU incorporation was used to monitor efficacy of DRB transcription inhibition. **(C)** FACS analysis of asynchronously growing U2OS cells (left panel) or U2OS cells treated as indicated following G1 cell cycle arrest using a double thymidine block. **(D)** Immunofluorescence using anti- $\gamma$ H2AX was used to monitor DNA DSB induction in irradiated or unirradiated cells treated with the indicated siRNAs. Images shown are from cells that were allowed to recover for 30 min following irradiation with 10 Gy and an unirradiated control (UT). **(E)** Table showing quality control data for exome sequencing. **(F)** Western blot analysis of whole cell extracts prepared from cells transfected with FLAG-tagged Cas9 + TMPRSS2 and ERG guide RNAs (Cas9-guide T/E) as illustrated in Figure 6C. DHT added to cell cultures at the same time as plasmid transfection in lanes with '+', and at 16hr post-transfection in lanes with '\*'. Cas9 expression is unaffected by DHT treatment. **(G)** Western blot analysis showing knockdown efficiency at Day3 (the point of Cas9 transfection) in LNCaP cells treated with the indicated siRNA.



# S1 (related to Fig 1)

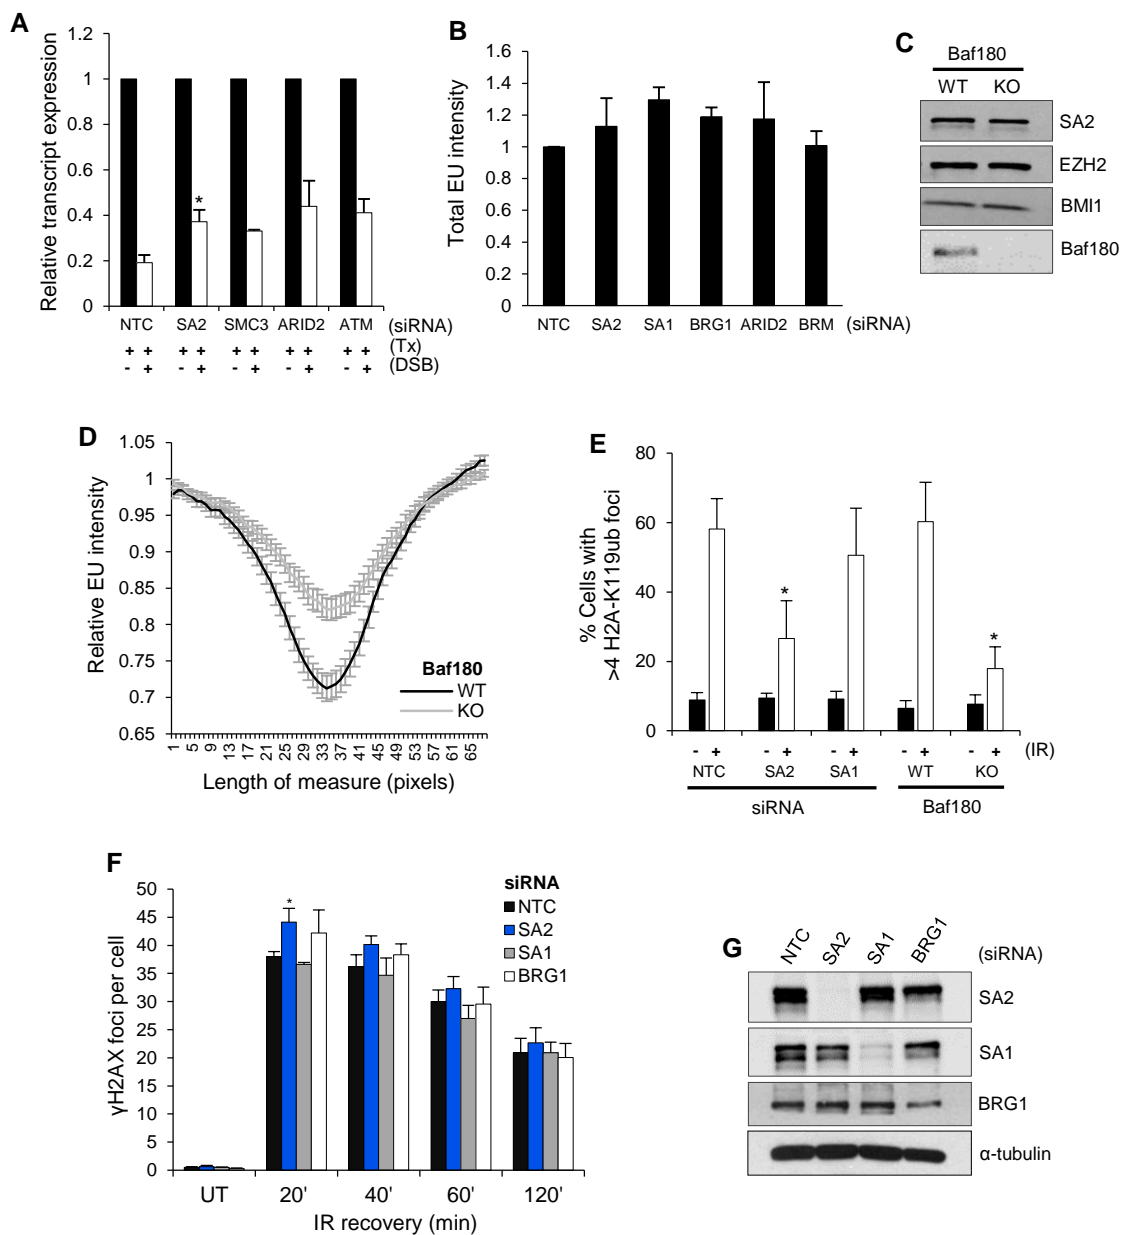

## S2 (related to Fig 2)

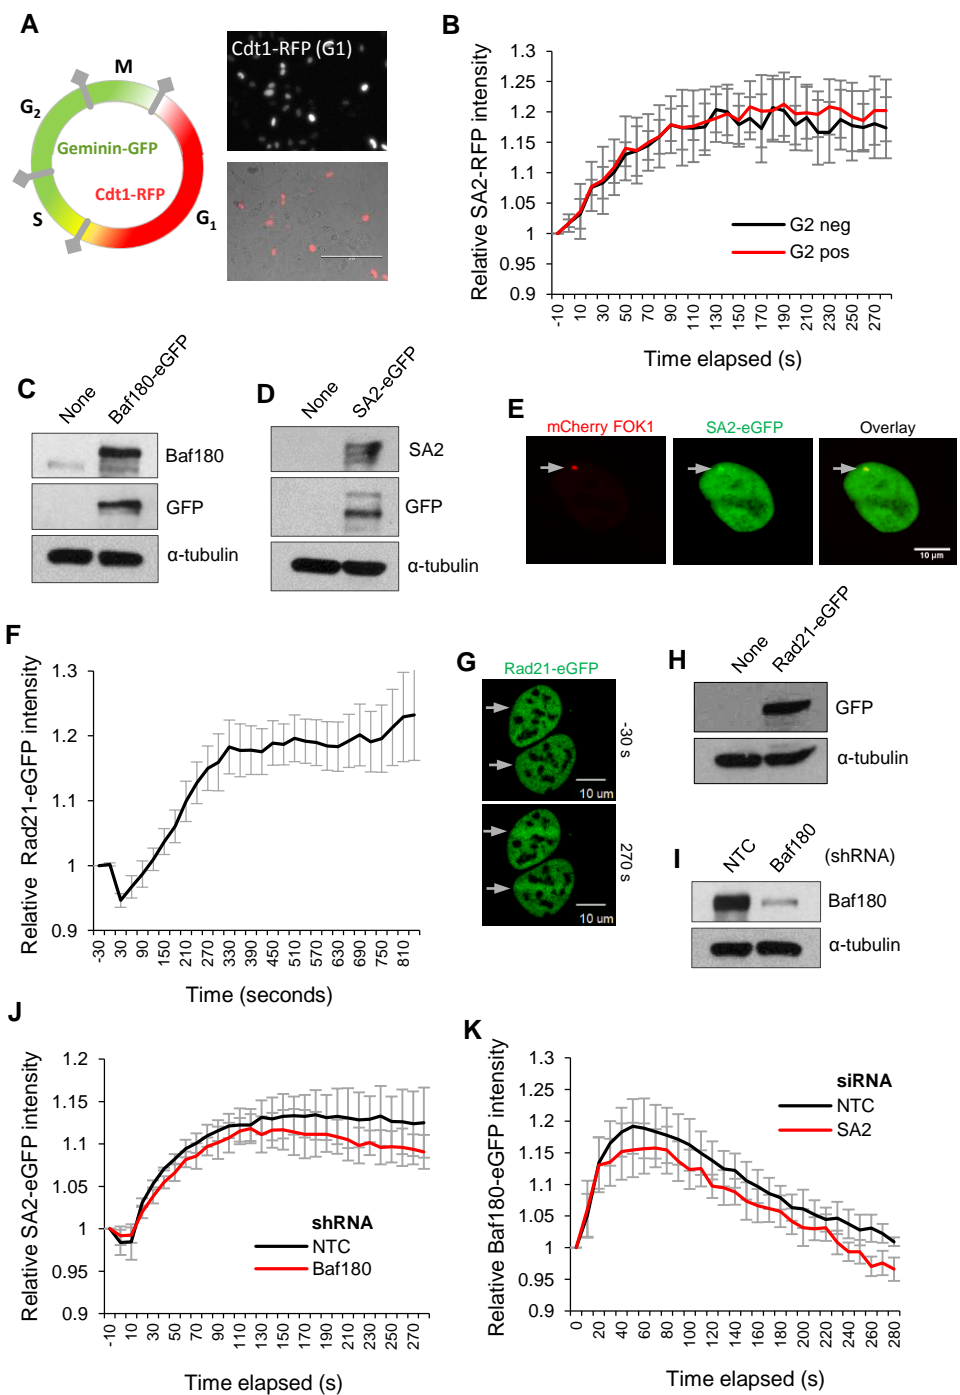

### S3 (related to 3)

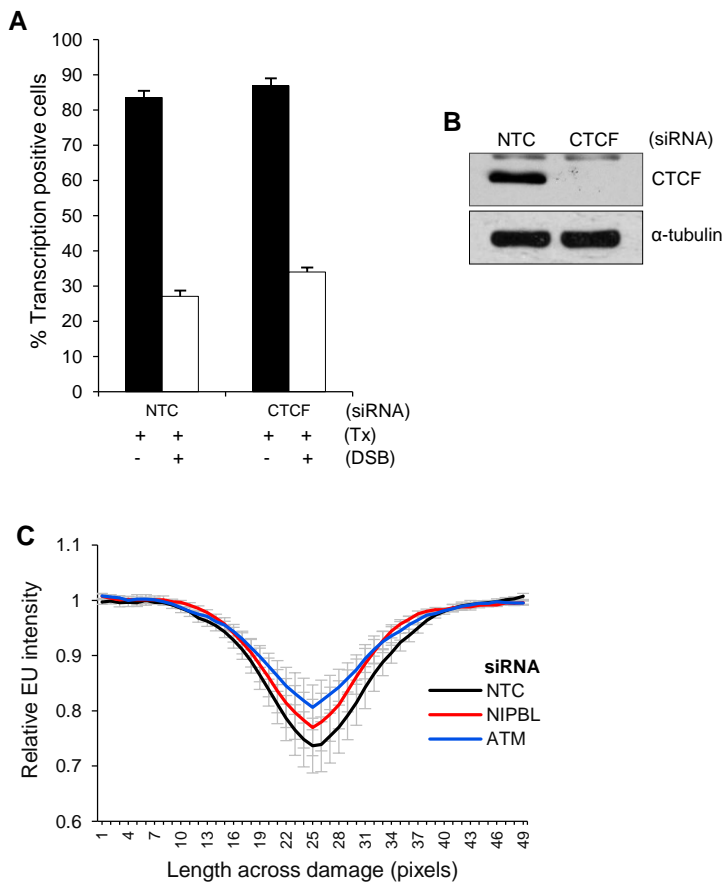

**S4 (related to Fig 4)**

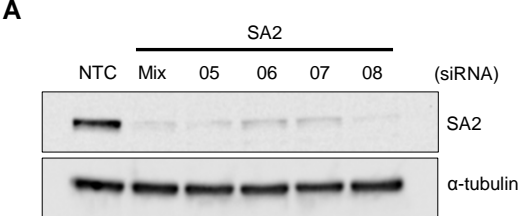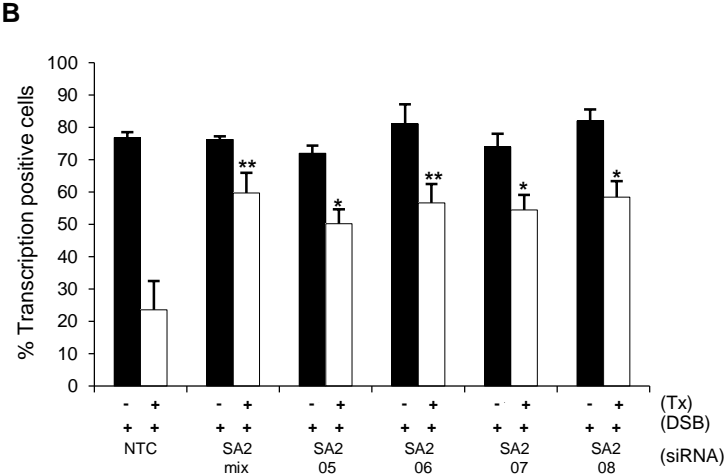

# S5 (related to Fig 5)

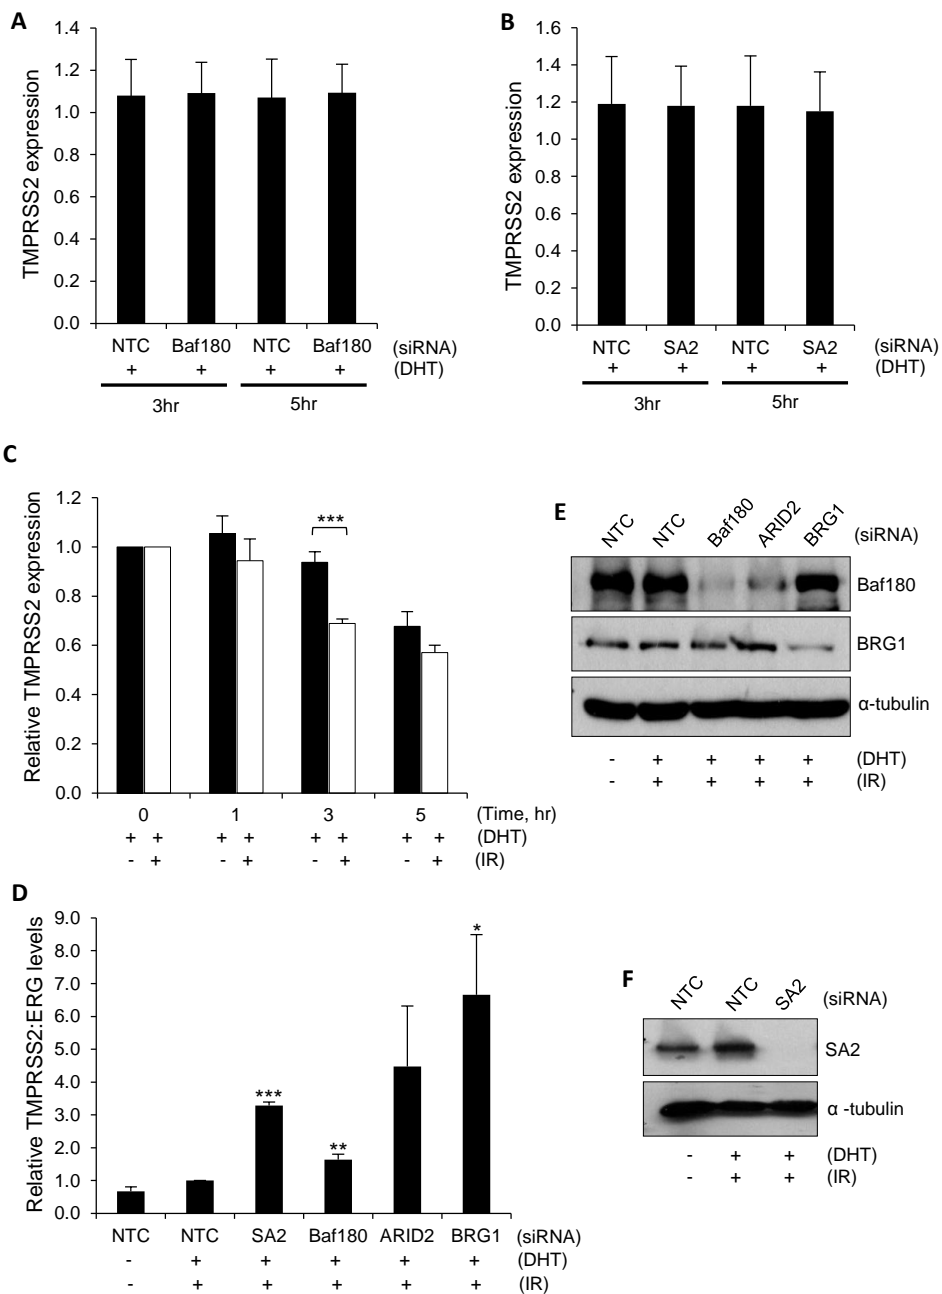

# S6 (related to Fig 6)

**A**

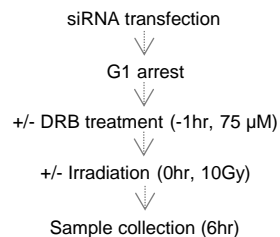

**B**

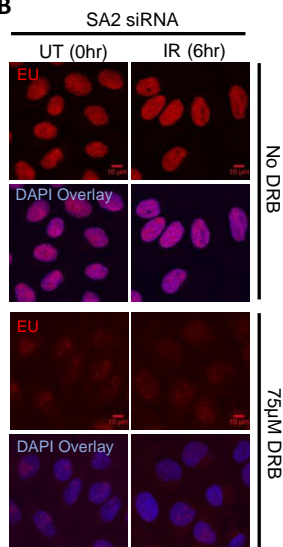

**C**

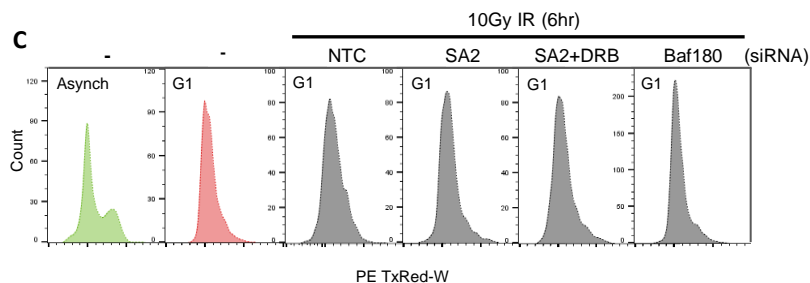

**D**

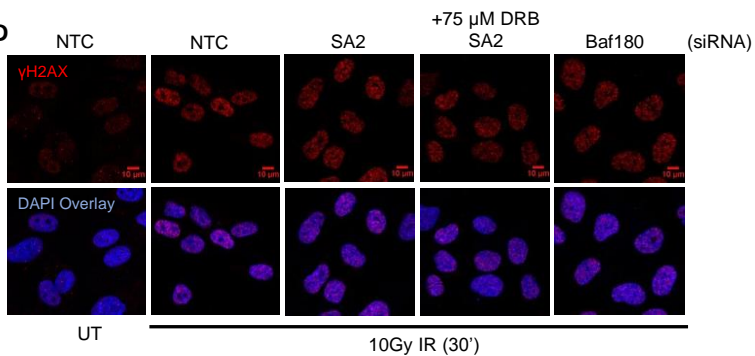

**E**

| Sample Name   | Total Unique Reads | % Reads Mapped | % Reads on Target | % of Duplicates | Median Depth | Mean Coverage |
|---------------|--------------------|----------------|-------------------|-----------------|--------------|---------------|
| Asynch_UT     | 95,658,434         | 94.27          | 68.29             | 5.39            | 78           | 92            |
| NTCsi_UT      | 95,566,183         | 94.53          | 69.79             | 5.41            | 80           | 94            |
| NTCsi_10Gy    | 95,490,278         | 94.38          | 69.88             | 5.23            | 80           | 94            |
| SA2si_UT      | 113,244,833        | 94.33          | 69.50             | 5.64            | 94           | 111           |
| SA2si_10Gy    | 114,054,732        | 94.51          | 68.01             | 5.14            | 92           | 109           |
| SA2si_10GyDRB | 108,036,400        | 94.47          | 67.90             | 4.99            | 87           | 103           |
| Baf180si_UT   | 100,240,936        | 94.34          | 68.62             | 5.28            | 81           | 97            |
| Baf180si_10Gy | 95,927,091         | 94.32          | 67.83             | 5.10            | 77           | 91            |

**F**

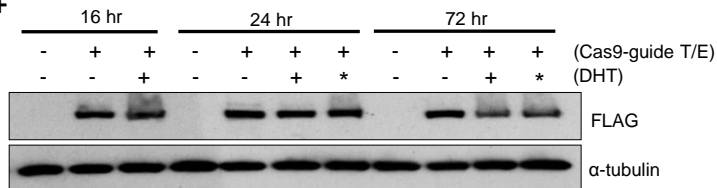

**G**

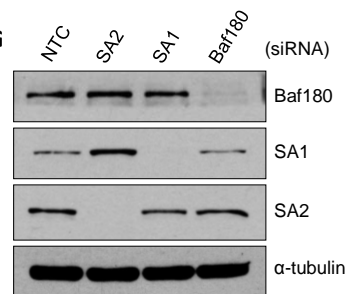

Supplement: mmc1.pdf [file mmc1.pdf]
